# Supplementary material for: Comparative Effects of Allulose, Fructose, and Glucose on the Small Intestine
Source: MDPI journal article supplement (doi:10.3390/nu14153230), 2022-08-07
Supplement: s1 [file s1]

**Table S1.** Primers sequences for qRT-PCR.

| Accession No.  | Gene Name                                                  | Primer sequence                                              | Product size (bp) |
|----------------|------------------------------------------------------------|--------------------------------------------------------------|-------------------|
| NM_001004198.1 | TATA box binding protein ( <i>Tbp</i> )                    | 5'-ATAATCCCAAGCGGTTTGCTG-3'<br>5'-TGCACACCATTTCCTCCAGAAC-3'  | 90                |
| NM_013061      | Sucrase-isomaltase ( <i>Si</i> )                           | 5'-GCAGAAGGCTACATGGA-3'<br>5'-CCTTGCGACTGTCTCA-3'            | 141               |
| NM_053841.1    | Lactase ( <i>Lct</i> )                                     | 5'-GATGAGCTATGCAGGCTATGG-3'<br>5'-ATGTGCCTTGAGGATCAGGT-3'    | 100               |
| NM_023963.2    | Caudal type homeobox 2 ( <i>Cdx2</i> )                     | 5'-TGGTGTACACAGACCATCAGC-3'<br>5'-CTGCGGTTCTGAAACCAAAAT-3'   | 142               |
| NM_13033.2     | Sodium-glucose co-transporter ( <i>Sglt1</i> )             | 5'TGTACCCTGTGTGGCT—3'<br>5'-GGTGCCGCAGTATTTC-3'              | 132               |
| NM_012879.2    | Glucose transporter 2 ( <i>Glut2</i> )                     | 5'-CTTGTTTCATGGTTGCTGAA-3'<br>5'-AAATTGCAGACCCAGTTGCT-3'     | 98                |
| NM_031741.1    | Facilitated fructose transporter ( <i>Glut5</i> )          | 5'-GTCTTGGAAGCGAGGAA-3'<br>5'-CAGGAAAGAAGGGCAGCA-3'          | 100               |
| NM_12556.2     | Fatty acid binding protein 1 , liver ( <i>Fabp1</i> )      | 5'-CCAAGTGCAGAGCCAAGAGA-3'<br>5'-CCCATAGGTGATGGTGAGTTTG-3'   | 143               |
| NM_013068.1    | Fatty acid binding protein 2 , intestinal ( <i>Fabp2</i> ) | 5'-GGCATTAACGTGGTGAAGAGG-3'<br>5'-GACGCCGAGTTCAAACACAA-3'    | 135               |
| NM_001106266   | Tight junction protein 1 ( <i>Tjp1</i> )                   | 5'-GCCGAAGCCAGTCACGATCT-3'<br>5'-TCTGCTCCGGGAGACTGCCAT-3'    | 98                |
| NM_053773.2    | Tight junction protein 2 ( <i>Tjp2</i> )                   | 5'-CGCTGAAGACCGCATGTCCT-3'<br>5'-TCCCTCGCCGTCCGTATCTT-3'     | 100               |
| NM_001108073.1 | Tight junction protein 3 ( <i>Tjp3</i> )                   | 5'-GCCGAGGACCAGCTGAATGG-3'<br>5'-CGCTGTTAGCCCGACTGTCA-3'     | 103               |
| NM_001012022   | Claudin 3 ( <i>Cldn3</i> )                                 | 5'-CACACCGCACCATCACCCT-3'<br>5'-ACTGCGTGGCGTCTGTAACC-3'      | 109               |
| NM_031702      | Claudin 4 ( <i>Cldn4</i> )                                 | 5'-AGCCGTGTTTCATCGTGGCAA-3'<br>5'-CGGAAGCCACCAGAGGGTTG-3'    | 98                |
| NM_001107135   | Claudin 7 ( <i>Cldn7</i> )                                 | 5'-CGTGGCAGGTCTTGCTGCTT-3'<br>5'-AGACCCTGCCCAGCCGATAA-3'     | 135               |
| NM_031700      | Claudin 15 ( <i>Cldn15</i> )                               | 5'-TGGGCGGCATCTGTGTCTTC-3'<br>5'-GAAGTGGCTCGGGCTGTCAC-3'     | 112               |
| NM_031329      | Occludin ( <i>Ocln</i> )                                   | 5'-CGCACGAGGTCTGCTGTCT-3'<br>5'-CCGGCCTGTAAGGAGGTGGA-3'      | 118               |
| NM_012736      | Apolipoprotein A-1 ( <i>Apoa1</i> )                        | 5'-TCAGGAGTTCTGGGCTAACCTG-3'<br>5'-ACCTCCTCGTTCCAATTCTCCT-3' | 132               |
| NM_012737      | Apolipoprotein A-4 ( <i>Apoa4</i> )                        | 5'-TGTTCTGAAGGCTGTGGT-3'                                     | 94                |

|                |                                                               |                                                              |     |
|----------------|---------------------------------------------------------------|--------------------------------------------------------------|-----|
|                |                                                               | 5'-CACATCACATTGGCCACCT-3'                                    |     |
| NM_019287      | Apolipoprotein B ( <i>Apob</i> )                              | 5'-AGCGCCACCAAGATTAAGT-3'<br>5'-CATGATGAGAGTGCAGACTTGG-3'    | 63  |
| NM_012501      | Apolipoprotein C3 ( <i>Apoc3</i> )                            | 5'-CTAAGCAGCATGCAGGAGTCT-3'<br>5'-CAGGGATTGAAGCGATTG-3'      | 72  |
| NM_021848.1    | Glucagon-like peptide 2 receptor ( <i>Glp2r</i> )             | 5'-CGGTATGTGTGCTGGCCTCA-3'<br>5'-GCAGTGTCTGTAGGCCCTTCC-3'    | 107 |
| NM_052807.2    | Insulin-like growth factor 1 receptor ( <i>Igf1r</i> )        | 5'-CGAAAACCATCGATTCTGTG-3'<br>5'-CCAATTCGAGGCAATGTTA-3'      | 111 |
| NM_012756.2    | Insulin-like growth factor 2 receptor ( <i>Igf2r</i> )        | 5'-TGGAAAGCTGTCCTTAGATGTGT-3'<br>5'-CGAAAGTCAGCTTGATTAAGG-3' | 128 |
| NM_013144.1    | Insulin-like growth factor binding protein1 ( <i>Igfbp1</i> ) | 5'-TGCCATTAGCACCTACAGCA-3'<br>5'-AACACTTTATAGAGTTCCCGTTGG-3' | 93  |
| NM_012588.2    | Insulin-like growth factor binding protein3 ( <i>Igfbp3</i> ) | 5'-GCCAGCGCTACAAAGTTGAC-3'<br>5'-GTGTGTCCTCCATTTCTCTGC-3'    | 114 |
| NM_001004274.2 | Insulin-like growth factor binding protein4 ( <i>Igfbp4</i> ) | 5'-CAACTTCCACCCCAAACAGT-3'<br>5'-GATCCACACACCAGCATTTG-3'     | 68  |
